# Supplementary material
Source: PubMed Central journal article supplement (PMC3421208)
Supplement: 1203285109_pnas.1203285109_SI.pdf [file 1203285109_pnas.1203285109_SI.pdf]

# Supporting Information

Levitas and Ravelo 10.1073/pnas.1203285109

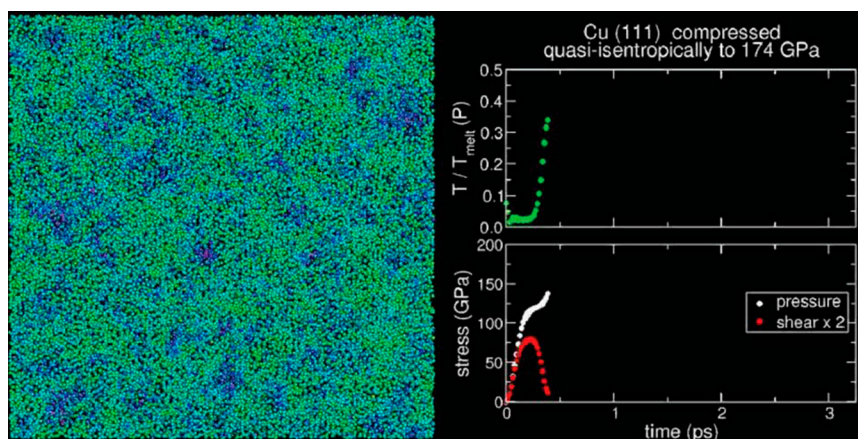

**Movie S1.** Cu single crystal compressed quasi-isotropically along the  $\langle 111 \rangle$  direction (out of plane) at a strain rate of  $3 \times 10^{11} \text{ s}^{-1}$  to a final uniaxial strain of 33% ( $\sigma_1 = 174 \text{ GPa}$ ) is shown. Axis  $x$  is along the  $\langle 110 \rangle$  direction and axis  $y$  is along the  $\langle 112 \rangle$  direction. The cross section of atomic configuration in the left panel is  $10 \text{ nm} \times 10 \text{ nm}$ . Only atoms within a  $1.7 \text{ nm}$  thick slice are shown for clarity. Atoms are colored according to  $q_6(1, 2)$  (red atoms are solid, green atoms are liquid). The right panel shows the time evolution of the temperature (normalized by the equilibrium melt temperature at the corresponding pressure), pressure ( $p$ ) and shear stress ( $\tau$ ).

1 Ten Wolde PR, Ruiz-Montero MJ, Frankel D (1995) Numerical evidence for bcc ordering at the surface of a critical fcc nucleus. *Phys Rev Lett* 75:2714–2717.

2 Steinhardt PJ, Nelson DR, Ronchetti M (1983) Bond-orientational order in liquids and glasses. *Phys Rev B Condens Matter Mater Phys* 28:784–805.

[Movie S1 \(MOV\)](#)
